# Supplementary material for: Maternal Diet Influences the Reinstatement of Cocaine-Seeking Behavior and the Expression of Melanocortin-4 Receptors in Female Offspring of Rats
Source: PubMed Central journal article supplement (PMC7284813; doi:10.3390/nu12051462), 2020-05-19
Supplement: nutrients-12-01462-s001.pdf [file nutrients-12-01462-s001.pdf]

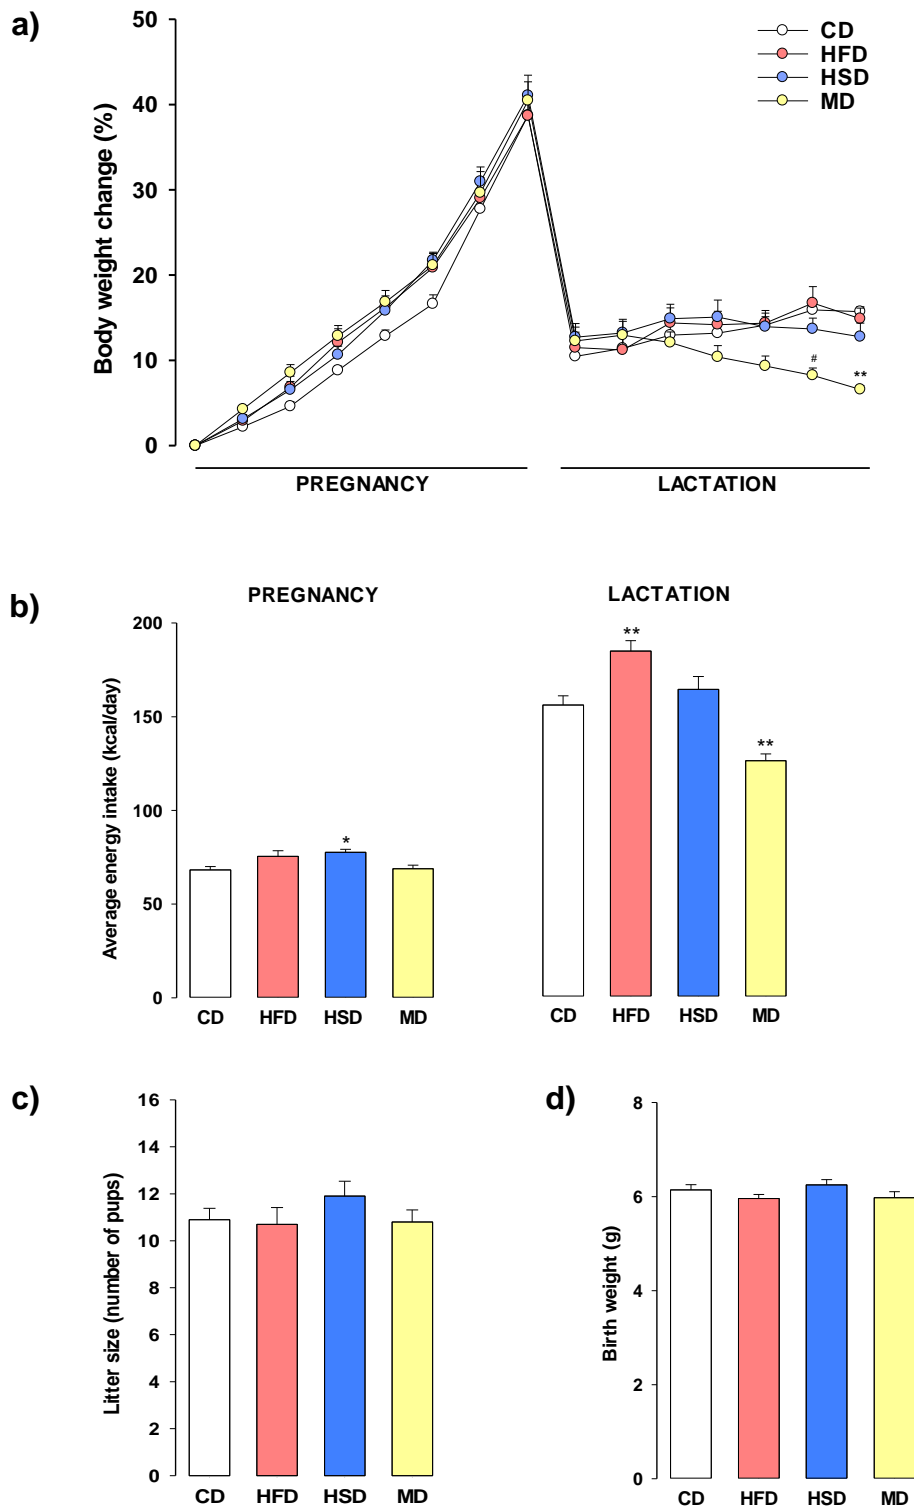

**Figure S1.** Effects of a high-fat (HFD), high-sugar (HSD), or mixed (MD) diet on (a) maternal body weight changes (as a percentage of weight gain compared to start weight) and (b) average daily energy intake during pregnancy and lactation. Effects of the modified maternal diets on (c) litter size and (d) birth body weight of female offspring. The results are expressed as the mean ( $\pm$ SEM).  $N = 10$  rats/group for dams and  $n = 32$  rats/group for female offspring. Data were analyzed by one- or two-way ANOVA followed by Dunnett's or Newman-Keuls post hoc tests. # $p = 0.06$ , \* $p < 0.05$ , \*\* $p < 0.01$  versus the control diet (CD) group.
